# Supplementary material
Source: publisher figshare collection journal article supplement (https://gsapubs.figshare.com/ndownloader/files/34823629)
Supplement: Supplementary file 1 [file 34823629]

Henriquez, S., DeCelles, P.G., Carrapa, B., and Hughes, A.N., 2022, Kinematic evolution of the central Andean retroarc thrust belt in northwestern Argentina and implications for coupling between shortening and crustal thickening: GSA Bulletin, <https://doi.org/10.1130/B36231.1>.

## Supplemental Material

**Figure S1.** Radial plots for AFT samples in the Sierra Alta (Coraya and Yacoraite Valleys).

**Figure S2.** Radial plots for AFT samples from the Tilcara Range, Cianzo area and east side of the Eastern Cordillera.

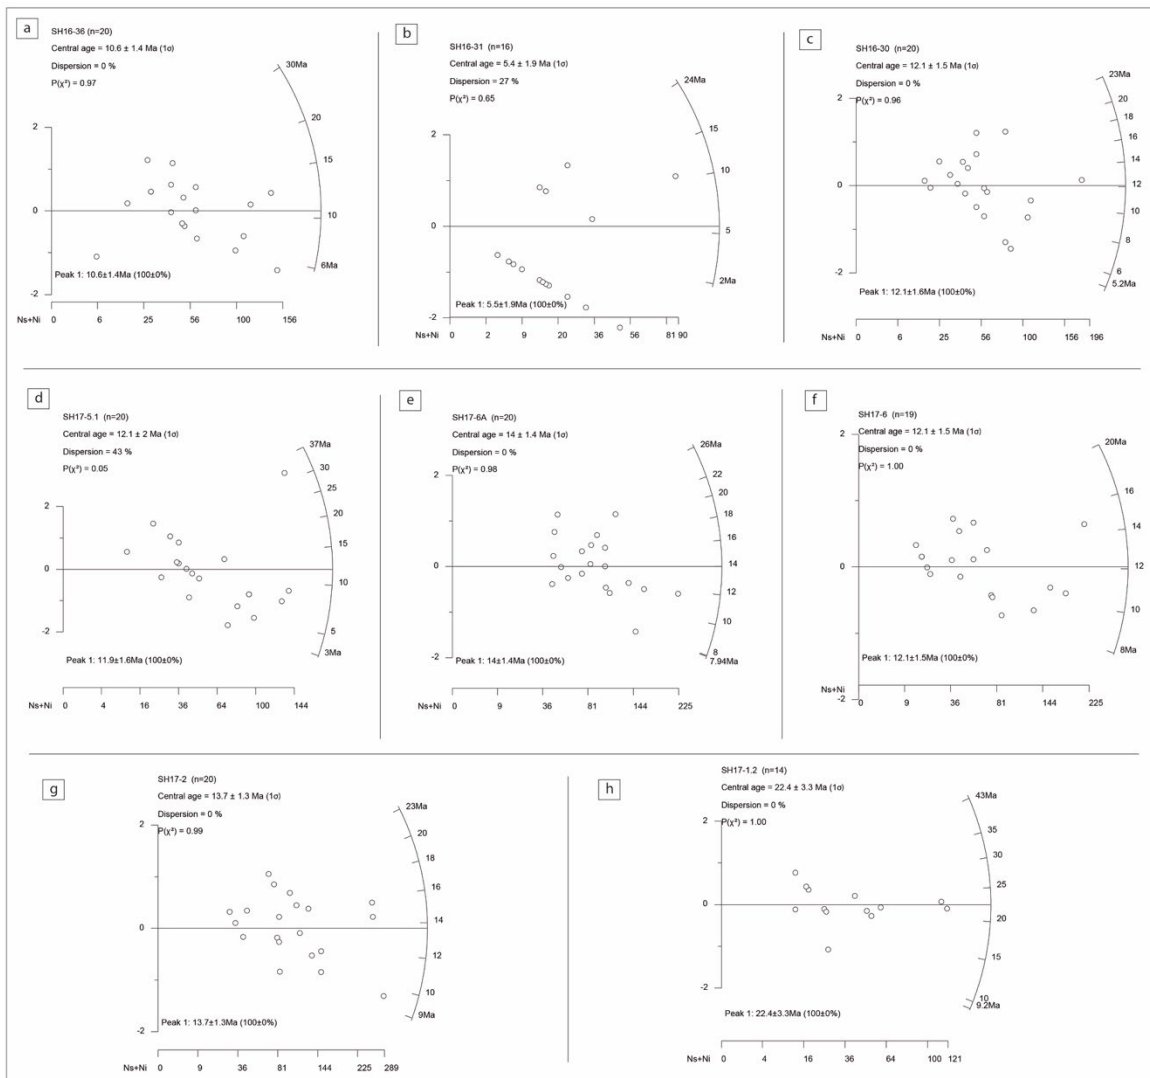

**Figure S1.** Radial plots for AFT samples in the Sierra Alta (Coraya and Yacoraite Valleys).

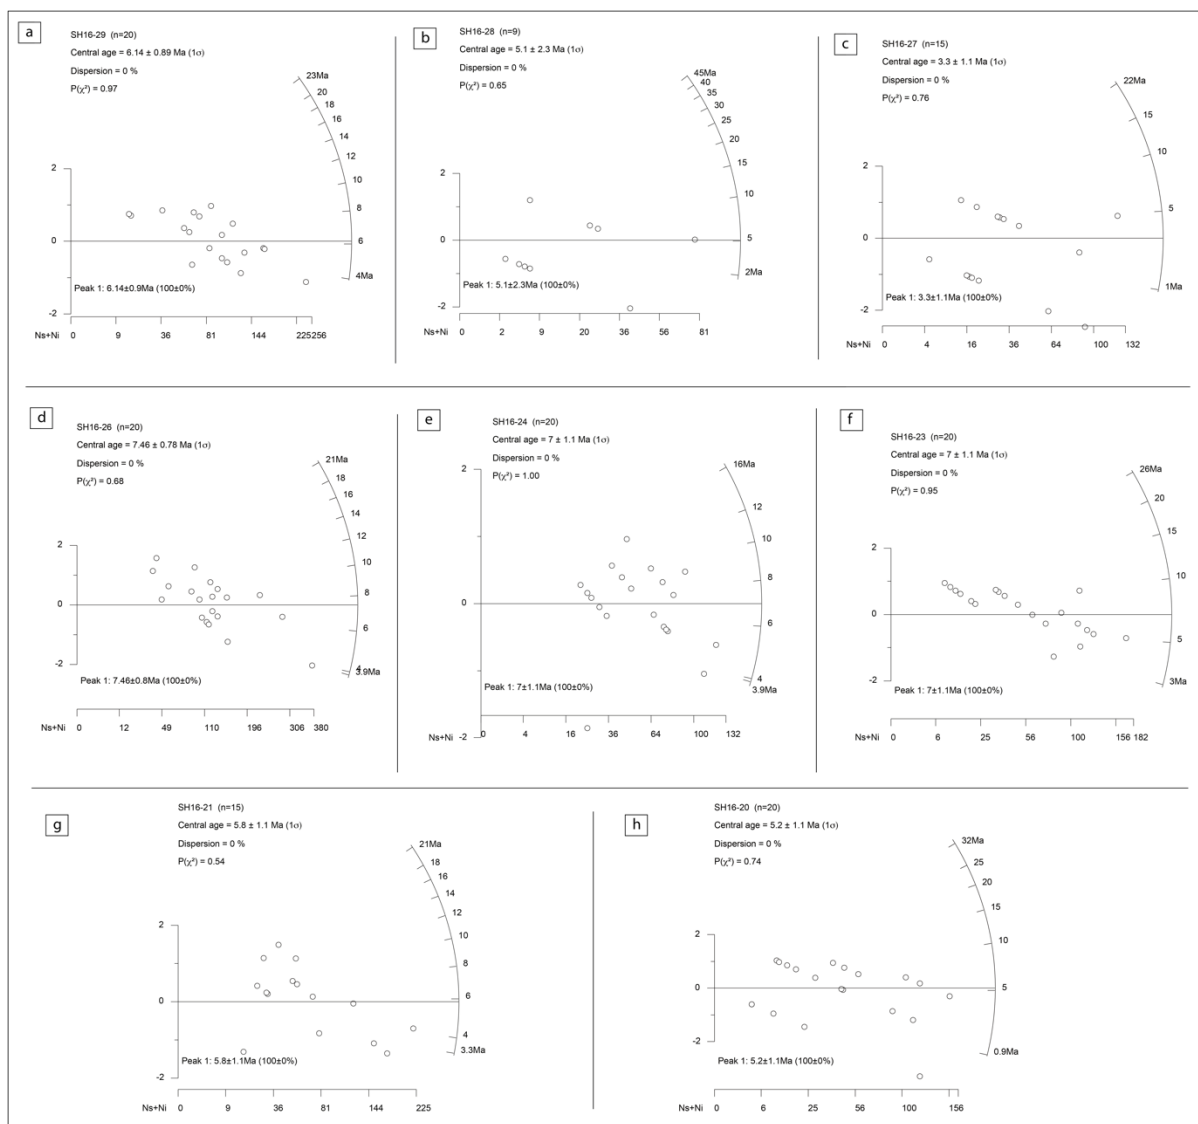

**Figure S2.** Radial plots for AFT samples from the Tilcara Range, Cianza area and east side of the Eastern Cordillera.
